# Supplementary material for: Durable Antibody Responses in Staff at Two Long-Term Care Facilities, during and Post SARS-CoV-2 Outbreaks
Source: PubMed Central journal article supplement (PMC8552744; doi:10.1128/spectrum.00224-21), 2021-07-21
Supplement: spectrum00224-21_supp_1_seq10.pdf [file spectrum00224-21_supp_1_seq10.pdf]

## Supplemental Figures

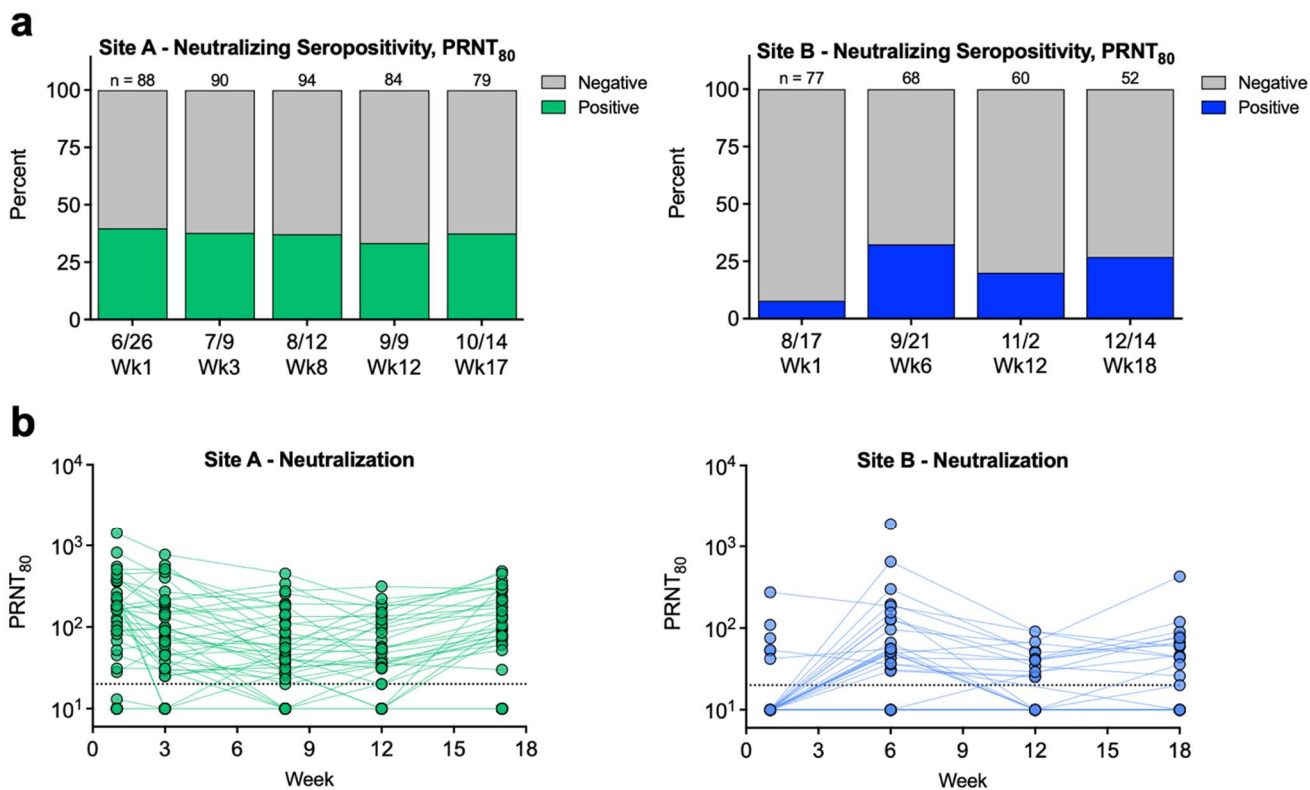

**Supplemental Figure 1. Polyclonal antibodies neutralize SARS-CoV-2 virus.** Polyclonal immune sera from sites A and B were evaluated for: **a)** Ability to neutralize SARS-CoV-2 virus. N indicates number of samples tested each week. **b)** Neutralizing antibody levels over time. PRNT<sub>80</sub> represents the serum dilution factor required to neutralize 80% of virus. Dashed line represents limit of detection (20). Non-neutralizing samples are graphed at half the limit of detection (10).

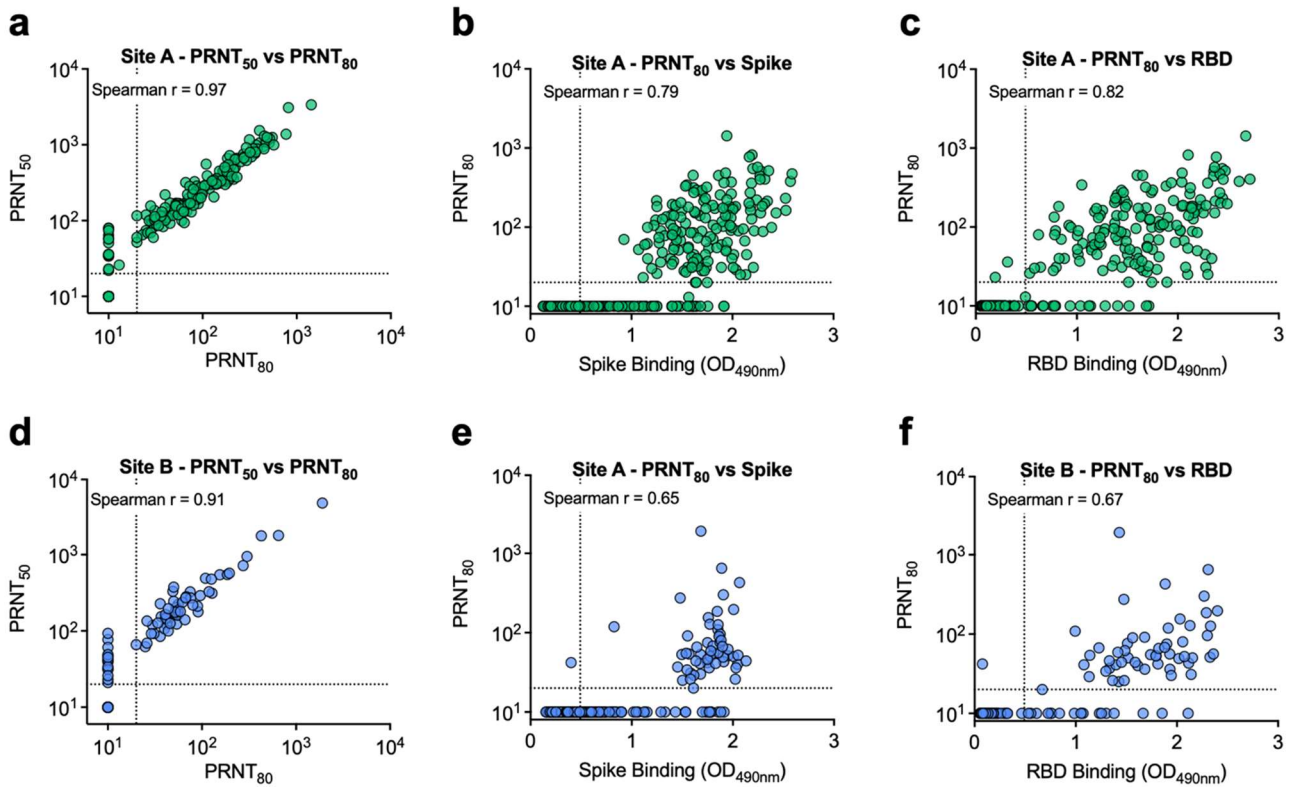

**Supplemental Figure 2. Spike binding, RBD binding and neutralizing antibody levels are highly correlated.** Samples from site A (a-c) and site B (d-f) were graphed by PRNT<sub>50</sub> and PRNT<sub>80</sub> (a, d), spike binding and neutralization titers (b, e) and RBD binding and neutralization titers (c, f). Spike and RBD dashed lines represent Youden cut-offs. PRNT<sub>50</sub> and PRNT<sub>80</sub> represents the serum dilution factor required to neutralize 50% and 80% of virus, respectively. PRNT<sub>50</sub> and PRNT<sub>80</sub> dashed line represents limit of detection (20). Non-neutralizing samples are graphed at half the limit of detection (10). Two-tailed, nonparametric Spearman correlation is noted in graphs.

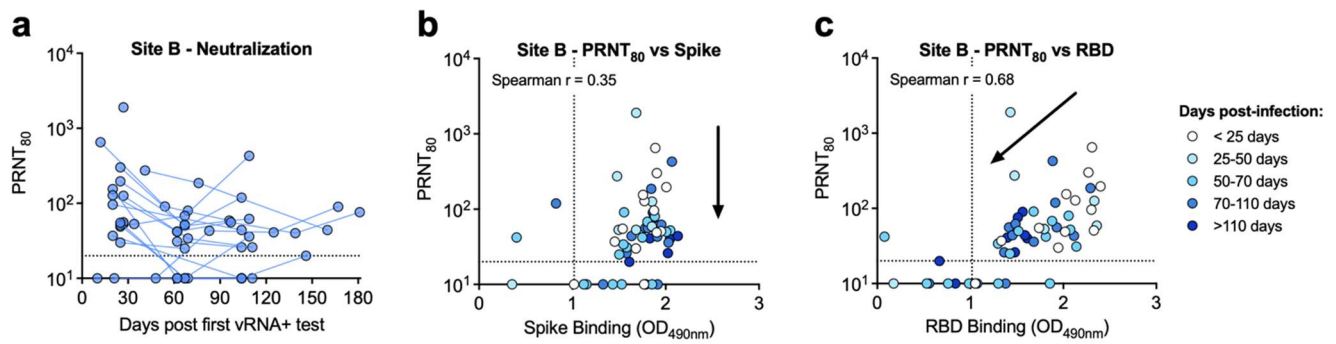

**Supplemental Figure 3. Trends in binding and neutralizing antibody levels vary over time.**

Individuals at site B who were infected during the course of the surveillance study were sampled up to 180 days post infection. **a)** Neutralizing antibody levels are graphed by days post-first vRNA positive test. **b & c)** Samples are stratified by days post-infection, and graphed by spike binding, RBD binding and neutralization titers. Arrows show trend of data over time. Spike and RBD dashed lines represent Youden cut-offs. PRNT<sub>80</sub> represents the serum dilution factor required to neutralize 80% of virus. PRNT<sub>80</sub> dashed line represents limit of detection (20). Non-neutralizing samples are graphed at half the limit of detection (10). Two-tailed, nonparametric Spearman correlation is noted in graphs
